# Supplementary material for: TP53 Mutation Is a Prognostic Factor in Lower Grade Glioma and May Influence Chemotherapy Efficacy
Source: MDPI journal article supplement (doi:10.3390/cancers13215362), 2021-10-26
Supplement: s1 [file s1]

## Supplementary File 2

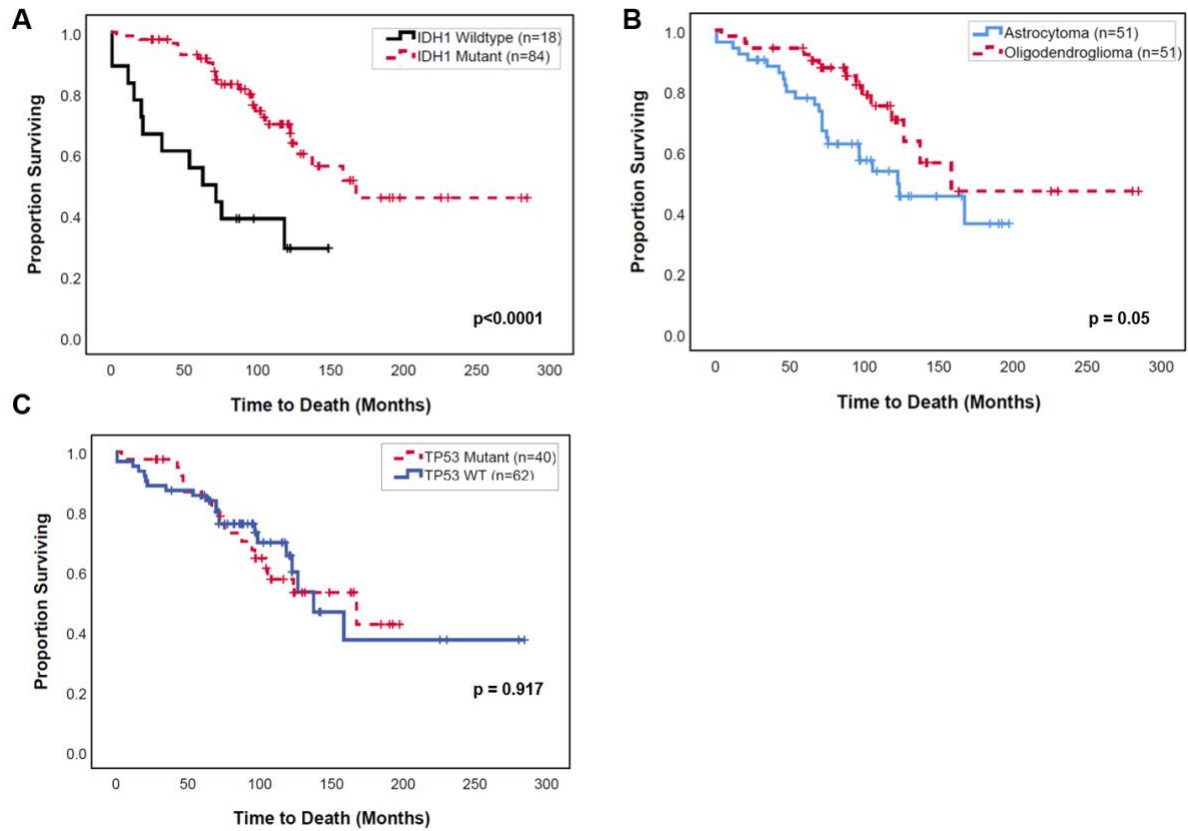

Figure S1. Kaplan-Meier survival curves stratified by (A) *IDH1* mutation status (B) type of LGG (C) *TP53* mutation status for the combined cohort of astrocytoma and oligodendroglioma. WT: Wildtype.
