# Supplementary material for: TP53 Mutation Is a Prognostic Factor in Lower Grade Glioma and May Influence Chemotherapy Efficacy
Source: MDPI journal article supplement (doi:10.3390/cancers13215362), 2021-10-26
Supplement: s1 [file s1]

## Supplementary File 1

Table S1: PCR conditions and primer sequences for *TP53* sequencing

| Exon    | Annealing<br>Temperature °C | Primer Sequences 5' to 3'                                                              |
|---------|-----------------------------|----------------------------------------------------------------------------------------|
| 1 and 2 | 64                          | <i>Forward</i> – CTCATGCTGGATCCCCACTTTTC<br><i>Reverse</i> - CCCAGCCCTCCAGGTCCCCAGCCC  |
| 3       | 66.4                        | <i>Forward</i> - GAGGGCTGGGGGGCTGGGGGGCTG<br><i>Reverse</i> - GGGGGATACGGCCAGGCATTGAAG |
| 4       | 66.4                        | <i>Forward</i> – GCCGTCTTCCAGTTGCTTTATCTG<br><i>Reverse</i> - GCAATCAGTGAGGAATCAGAGGCC |
| 5       | 68                          | <i>Forward</i> - GCAGCTGGGGCTGGAGAGACGAC<br><i>Reverse</i> - CTCACCTGGAGGGCCACTGACAAC  |
| 6       | 60.4                        | <i>Forward</i> - CCTGCTTGCCACAGGTCT<br><i>Reverse</i> - GTGTGCAGGGTGGCAAGT             |
| 7       | 56.7                        | <i>Forward</i> - CAAGGGTGGTTGGGAGTAGATGG<br><i>Reverse</i> - GAAAGGTGATAAAAGTGAATCTG   |
| 8       | 64                          | <i>Forward</i> - GCAAGCAGGACAAGAAGCGGTGG<br><i>Reverse</i> - CCATTGTCTTTGAGGCATCACTGC  |
| 9       | 50.5                        | <i>Forward</i> - CTAAATGCATGTTGCTTTTGTAC<br><i>Reverse</i> - GAATGGAATCCTATGGCTTTCC    |
| 10      | 64                          | <i>Forward</i> - GCCCTTCAAAGCATTGGTCAGGG<br><i>Reverse</i> - GCAAGGGTTCAAAGACCCAAAACC  |
