# Supplementary material for: TP53 Mutation Is a Prognostic Factor in Lower Grade Glioma and May Influence Chemotherapy Efficacy
Source: MDPI journal article supplement (doi:10.3390/cancers13215362), 2021-10-26
Supplement: s1 [file s1]

### Supplementary File 3

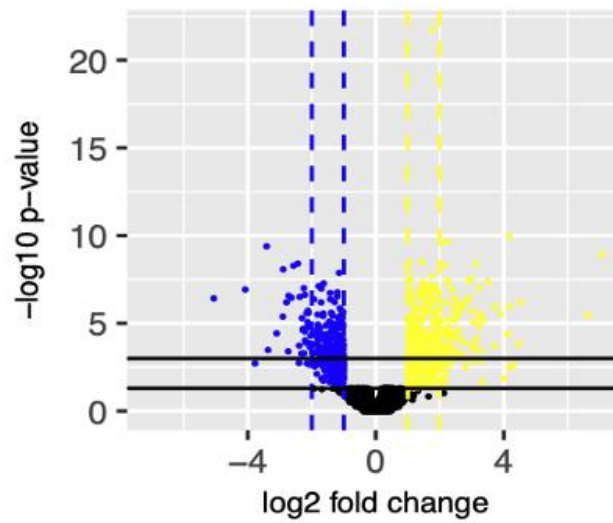

Figure S2: Volcano plot portraying differentially expressed genes between *YAPI* high and *YAPI* low groups in CGGA recurrent chemotherapy treated astrocytoma.
