# Supplementary material for: TP53 Mutation Is a Prognostic Factor in Lower Grade Glioma and May Influence Chemotherapy Efficacy
Source: Cancers (Basel). 2021 Oct 26;13(21):5362. doi: 10.3390/cancers13215362 (PMC8582451; doi:10.3390/cancers13215362)
Supplement: Supplementary file 1 [file cancers-13-05362-s001.zip › Supplementary File 4.pdf]

### Enriched in YAP1 HIGH Group

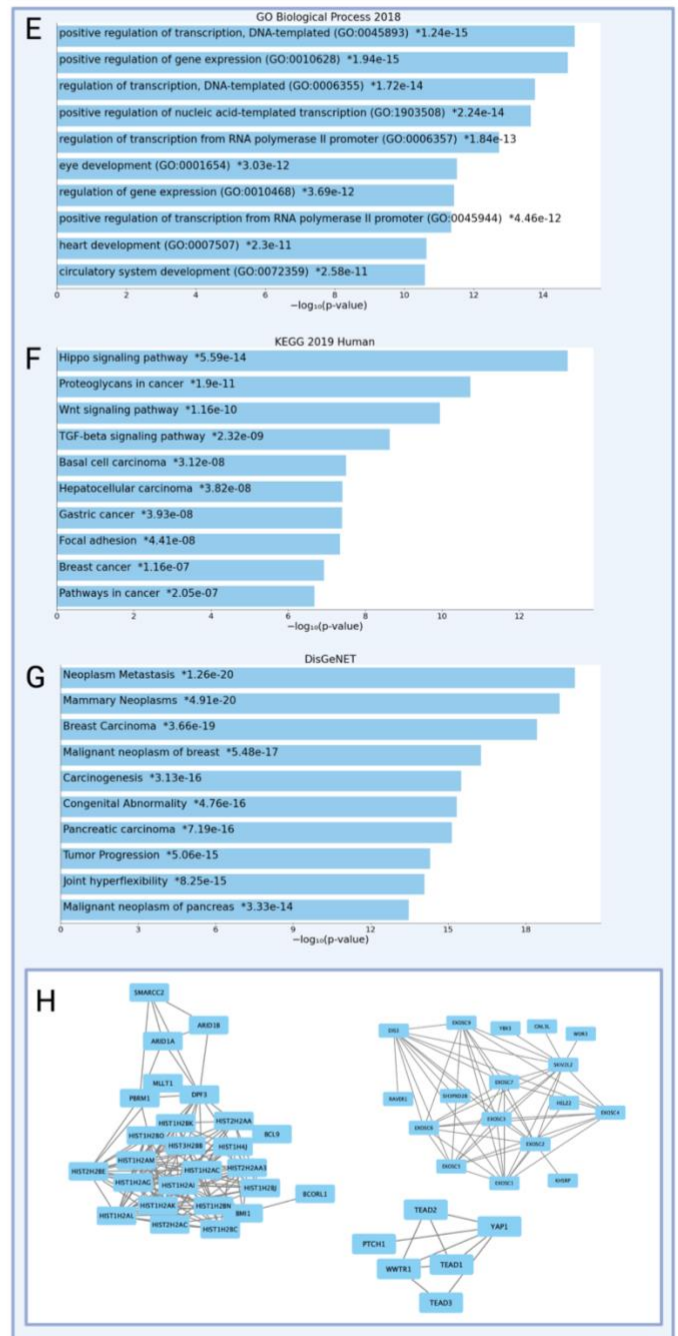

**Figure S3** GO enrichment terms of differentially expressed genes, KEGG pathway, DisGenNet analysis of *YAP1* low (A, C, E) and *YAP1* high (B, D, F) respectively. Top three PPI network module of *YAP1* low (G) and *YAP1* high groups (H).
