# Supplementary figures and images for: TP53 Mutation Is a Prognostic Factor in Lower Grade Glioma and May Influence Chemotherapy Efficacy
Source: MDPI journal article supplement (doi:10.3390/cancers13215362), 2021-10-26

### Enriched in YAP1 HIGH Group

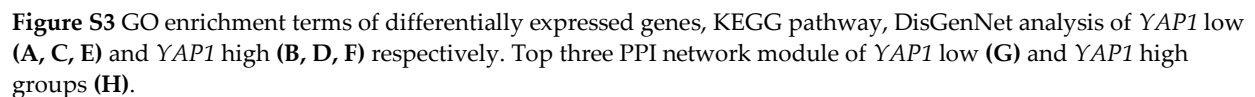

Supplement: s1 [file s1]
